# Supplementary material
Source: PubMed Central journal article supplement (PMC5547819)

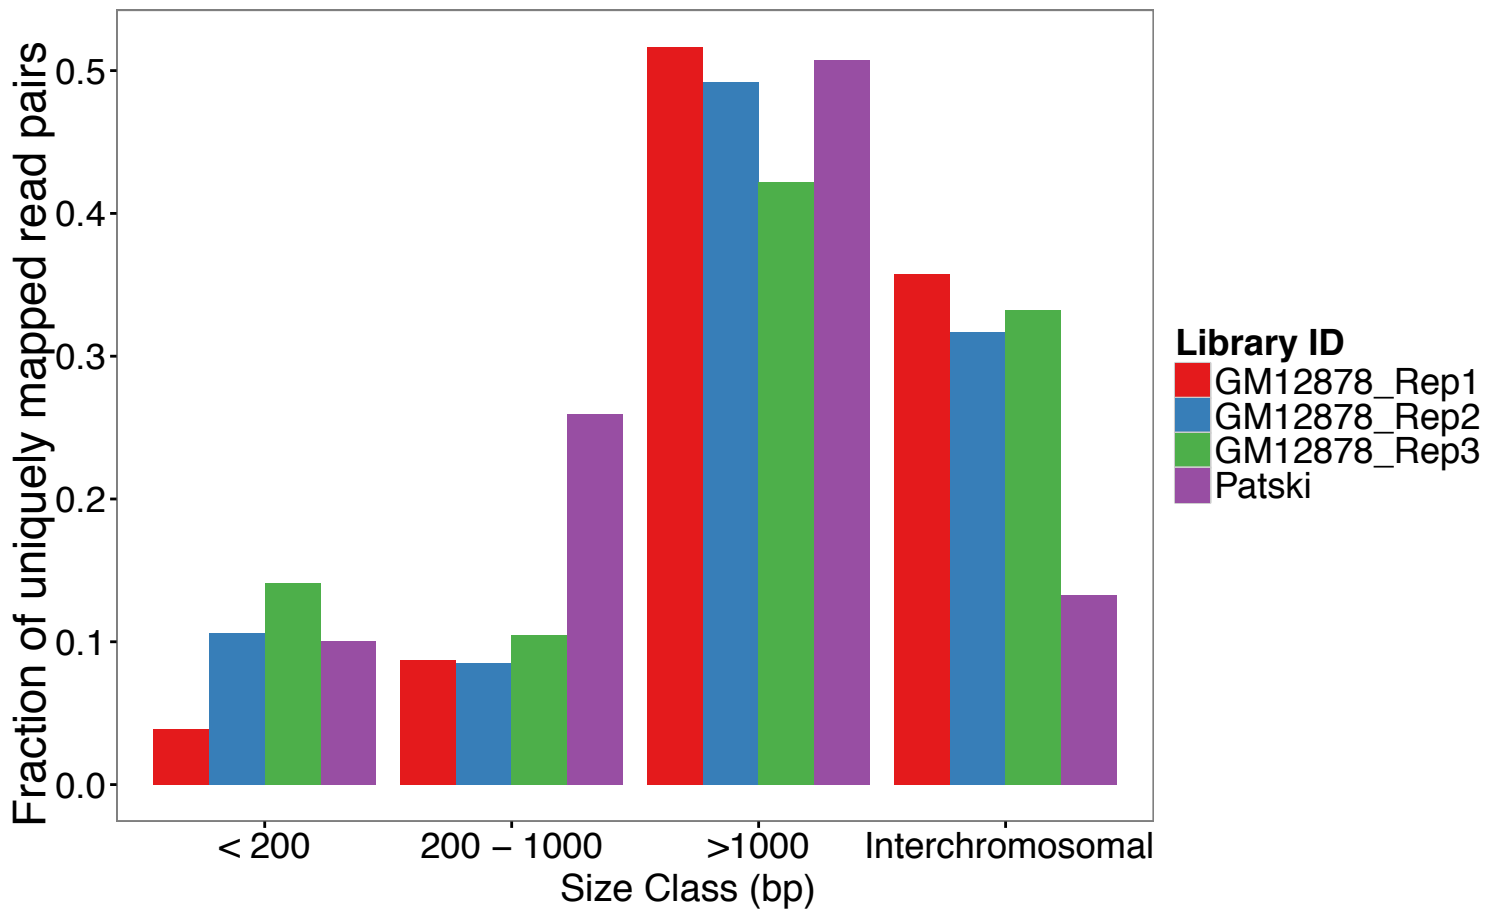

Supplementary Figure 1

Supplement: NIHMS883285-supplement-supplement_1.pdf [file NIHMS883285-supplement-supplement_1.pdf]
